# Supplementary material for: A new perspective on metformin therapy in type 1 diabetes
Source: Springer Nature journal article supplement (doi:10.1007/s00125-017-4364-6), 2017-08-02
Supplement: MOESM1 [file 13344968]

## **The REMOVAL Study Team**

### **Steering Committee**

J Petrie (Chair and Chief Investigator; University of Glasgow, UK); H Colhoun (Deputy Chief Investigator; University of Dundee, UK); N Chaturvedi (University College London, UK), I Ford (University of Glasgow, UK); I Hramiak<sup>a</sup> (University of Western Ontario, ON, Canada); A Hughes (University College London, UK); A Jenkins<sup>a</sup> (University of Sydney, NSW, Australia); B Klein (University of Wisconsin, WI, USA); R Klein (University of Wisconsin, WI, USA); T Ooi (The Ottawa Hospital, ON, Canada); P Rossing<sup>a</sup> (Steno Diabetes Center, Denmark); N Sattar (University of Glasgow, UK); C Stehouwer<sup>a</sup> (University of Maastricht, Netherlands). H Nickerson, O Lou, S Dutta (non-voting) (JDRF representatives, New York, NY, USA). Jonathan Haw (patient representative, London, UK; deceased); C Anderson (patient representative, Glasgow, UK).

<sup>a</sup>Also National Principal Investigator

### **Trial coordination**

Robertson Centre for Biostatistics, University of Glasgow, UK: I Ford<sup>b</sup>, S Kean, E Thomson, L Gillespie, J Gibb, N Greenlaw. Robarts Research Institute (ON, Canada): I Hramiak<sup>b</sup>, S Tereschyn. NHMRC Clinical Trials Centre (Sydney, NSW, Australia): A Keech<sup>b</sup>, A Jenkins<sup>b</sup>. Carotid Reading Centre (University College London, UK): N Chaturvedi<sup>b</sup>, A Hughes<sup>b</sup>, K March, S Williams, E Coady, T Tillin. Carotid External Quality Assurance (Julius Centre for Health Sciences, Utrecht, Netherlands): M Bots<sup>b</sup>. Retinal Grading Centre (University of Wisconsin, WI, USA): R Klein<sup>b</sup>, B Klein<sup>b</sup>, J Dreyer, T Jan. ENDOPAT Centre (Itamar Medical, Israel): Koby Sheffy<sup>b</sup>, Ravit Lusky, Shlomit Peleg. ENDOPAT Committee: J Petrie<sup>b</sup> (Glasgow,

UK), H Colhoun (Dundee, UK), A Shore (Exeter, UK), D Carty, C Delles (Glasgow, UK). Data Monitoring Committee: P Donnan<sup>b</sup> (Dundee, UK), M Witham (Dundee, UK), A Adler (Cambridge, UK), E Lonn (Toronto, ON, Canada), P Rauchhaus (DMC Statistician, Dundee, UK). Glycaemia Committee: I Hramiak<sup>b</sup> (Ontario, ON, Canada), R Lindsay (Glasgow, UK), M Brouwers (Maastricht, The Netherlands). Project Management Unit (NHS Glasgow, UK): J Van-Melckebeke<sup>b</sup>, L Gillespie, T Hamill, L Cuthbertson, A Murray, L Jolly, E Miller. Biomarker Laboratory (University of Glasgow, UK): N Sattar<sup>b</sup>, P Welsh<sup>b</sup>. Biorepository (NHS Glasgow, UK): J Hair<sup>b</sup>, A Bell; Drug Supply Management (NHS Glasgow, UK): S Carmichael<sup>b</sup>, E Douglas, P Surtees. Pharmacovigilance (NHS Glasgow, UK): E Dinnett<sup>b</sup>: J Allan, S Kean. Data Monitoring (NHS Glasgow, UK): C Watson<sup>b</sup>, M McLaughlin, G Brindley, E Smillie. Financial Management: D Motherwell<sup>b</sup>, S MacDonald (Glasgow). Contracts and Agreements: P Ellis<sup>b</sup>, D Stuart (University of Glasgow, UK); M Travers<sup>b</sup> (NHS Glasgow, UK). Scottish Diabetes Research Network: S Brearley<sup>b</sup>, L Greig. Patient representative: J Haw (London, UK; deceased).

<sup>b</sup>Lead investigator or collaborator

### **Recruiting Centres and Site Staff**

**Australia** Melbourne (Royal Melbourne Hospital, VIC): P Colman (PI), A Nankervis, S Forulanos; D West; S Vaughan, M Bjorasen; J Donlon<sup>c</sup>. Melbourne (St Vincent's Hospital, VIC): D O'Neal (PI), J Horsburgh, H Pater, S Kent, J Vrazas. Sydney (Royal Prince Alfred Hospital, NSW): S Twigg (PI), G Fulcher, R Denner, A Piotrowicz, A Coy, H Pater, A Januszewski<sup>c</sup>.

**Canada** London, ON: I Hramiak (PI), T Paul, C McDonald, S Tereschyn, N Schmidt, M Weingert, M Weingert<sup>c</sup>, H Heard<sup>c</sup>, S Burke<sup>c</sup>. Ottawa, ON: TC Ooi (PI), H Lochnan (Co-PI),

A Sorisky, E Keely, J Malcolm, J Maranger, C Favreau, S Petherick<sup>c</sup>, K Boles<sup>c</sup>.

Denmark Steno Diabetes Center (Gentofte): P Rossing (PI), TW Hansen, B Hemmingsen<sup>c</sup>.

**England** Bristol (Bristol Royal Infirmary): N Thorogood (PI), K Green, T Robinson<sup>c</sup>. Durham (University Hospital): K Abougilia (PI), D Nayman, C Miller<sup>c</sup>. Exeter (Royal Devon and Exeter Hospital): R Warren (PI), K Aizawa<sup>c</sup>; Gloucester (Gloucestershire Royal Hospital): Dr M Balasubramani (PI), S Toth, K Harvey<sup>c</sup>, G Birch<sup>c</sup>. Hull (Michael White Centre for Diabetes): T Sathyapalan (PI), A James, Z Javed<sup>c</sup>. Liverpool (Aintree University Hospital): J Wilding (PI), B Martin, S Birch, A Wilcox<sup>c</sup>, N Watson<sup>c</sup>. London (St Mary's Hospital): N Oliver (PI), N Jugnee, K March<sup>c</sup>. Manchester (Central Manchester University Hospitals): M Rutter (PI), T Turgut (Co-PI), A Shaju, S Yau, S Subin<sup>c</sup>. Newcastle (Royal Victoria Infirmary): M Walker (PI), D Wake, C Miller<sup>c</sup>; Plymouth (Derriford Hospital): A Millward<sup>a</sup> (PI), P Chong (PI), M Hibbert, J George<sup>c</sup>.

**The Netherlands** Maastricht University Medical Centre: Professor Coen Stehouwer (PI), MC Brouwers (Co-PI), N Schaper, J Pinxt, J op het Roodt<sup>c</sup>.

**Scotland** Aberdeen (Aberdeen Royal Infirmary): S Phillips (PI), L Murray, Linda Sleigh<sup>c</sup>. Ayr (Ayr Hospital): A Collier/ LE Sit (PIs), K Allan, J Cook, K Campbell<sup>c</sup>, L Hodge<sup>c</sup>. Dundee (Ninewells Hospital): G Leese, G Reekie, K Shields<sup>c</sup>. Edinburgh (Royal Infirmary): A Jaap (PI), A Sudworth, A White<sup>c</sup>. Edinburgh (Western General): J McKnight (PI), L Steven, A White<sup>c</sup>; Glasgow (Stobhill Hospital): G McKay (PI), A Llano (deputy-PI), G Currie, E Lennon, J Johnstone, K Shields<sup>c</sup>.

<sup>a</sup>Also National Principal Investigator

<sup>c</sup>Sonographer

PI, Principal investigator
